# Supplementary material
Source: Springer Nature journal article supplement (https://www.springermedizin.de/resource/supplementary/12885_2010_2631_MOESM7_ESM.pdf/9461592)

## a. Vimentin

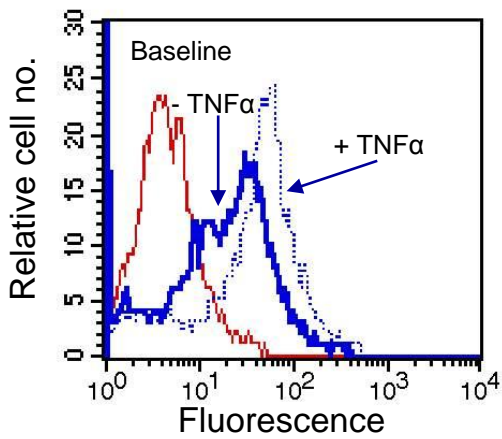

## b. Cellular protrusions

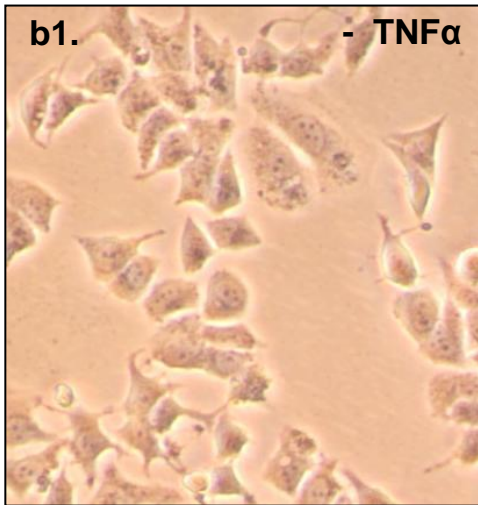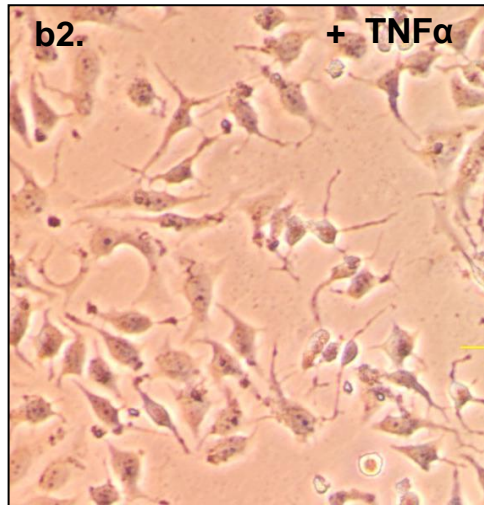

## c. Actin re-organization

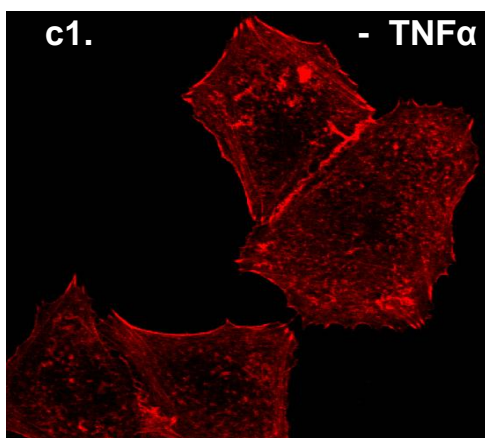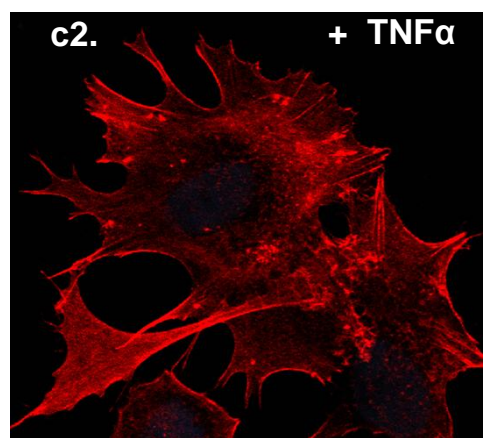

Supplement: MOESM7 [file 9461592]
